# Supplementary material for: Large-Scale Integration of All-Glass Valves on a Microfluidic Device
Source: MDPI journal article supplement (doi:10.3390/mi7050083), 2016-05-06
Supplement: s1 [file s1]

# Supplementary Materials: Large-Scale Integration of All-Glass Valves on a Microfluidic Device

Yaxiaer Yalikun and Yo Tanaka \*

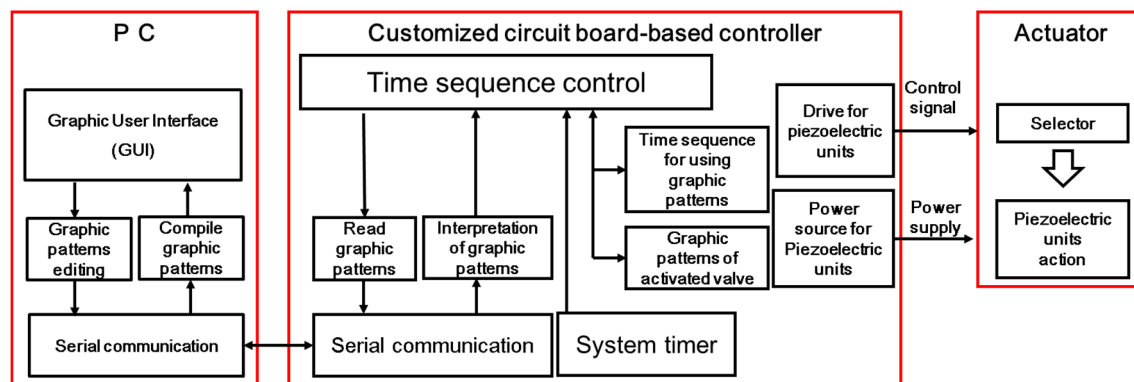

**Figure S1.** System architecture of computer-controlled piezoelectric units customized by the KGS Corporation.

The valve that needs to be opened was defined as an activated valve, and a graphic pattern that marked the position of the activated valve was edited and compiled as a machining description using a Graphic User Interface (GUI) on a PC. Then the graphic pattern was translated to a position and an activating time sequence of the valve through the customized circuit board-based controller. Finally, the valve in the translated position of the graphic pattern was activated according to the time sequence edited at the GUI.

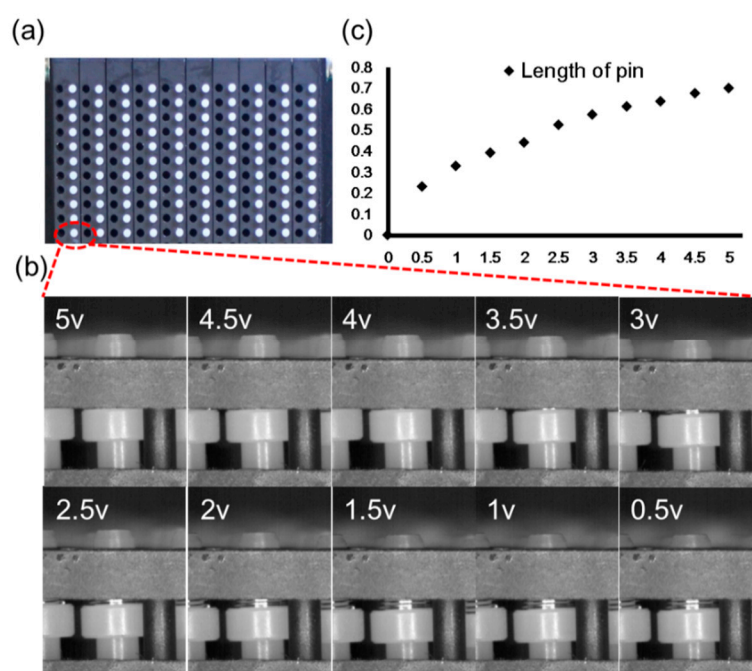

**Figure S2.** Dependence between applied voltage and length of piezoelectric unit. (a) Heads of piezoelectric units. The white dots indicate individual piezoelectric units; (b) Side views of the length of a piezoelectric unit when different voltages were applied; (c) Graph showing that the length of the piezoelectric unit was proportional to the applied voltage in the range of 0–5 V.

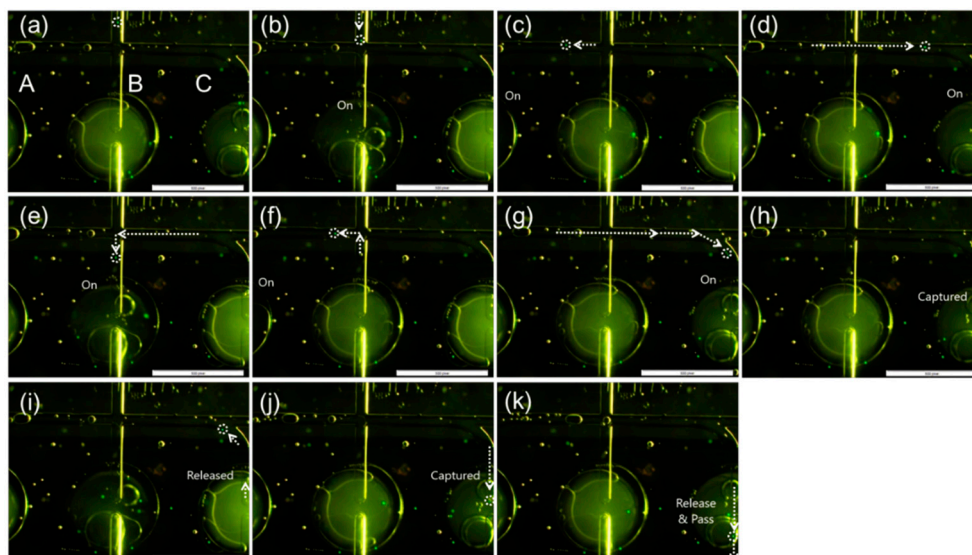

**Figure S3.** Manipulation of a 20- $\mu\text{m}$ -diameter particle using a sequence of valve operations. Captured images from video S6. (a) Introducing a 20- $\mu\text{m}$ -diameter particle to the channel in the center; (b) Initial status of valve A, off; B, on; C, off; positions of the particle in the center channel and moving toward valve B; (c) A was turned on, and B and C were off; the flow was toward A and included the particle; (d) C was turned on, and B and A were off; the flow was toward C and included the particle; (e) B was turned on, and A and C were off; the flow was toward B and included the particle; (f) A was turned on, and B and C were off; the flow was toward A and included the particle; (g) C was turned on, and B and A were off; the flow was toward C and included the particle; (h) The particle was captured by valve C in front of the inlet port; (i) The particle was released by valve C and flowed to A; (j) The particle was captured by valve C in the chamber; (k) Released, The particle was released to outlet port of valve C and flowed past valve C to the next valve.
